# Supplementary material for: Spatiotemporal insights into forced dynamic reactor operation for fast light-off of Pd-based methane oxidation catalysts
Source: Royal Society of Chemistry journal article supplement (doi:10.1039/d4cy00625a), 2024-01-01
Supplement: d4cy00625a1.pdf [file d4cy00625a1.pdf]

## Supporting Information

### Spatiotemporal insights into forced dynamic reactor operation for fast light-off of Pd-based methane oxidation catalysts

Supporting Information

Kevin Keller<sup>†,a</sup>, Daniel Hodonj<sup>†,a</sup>, Lukas Zeh,<sup>a</sup> Lachlan Caulfield,<sup>b</sup> Eric Sauter,<sup>b</sup> Christof Wöll,<sup>b</sup> Olaf Deutschmann,<sup>a</sup> and Patrick Lott<sup>\*a</sup>

Catal. Sci. Technol. 2024

\*Corresponding author (patrick.lott@kit.edu)

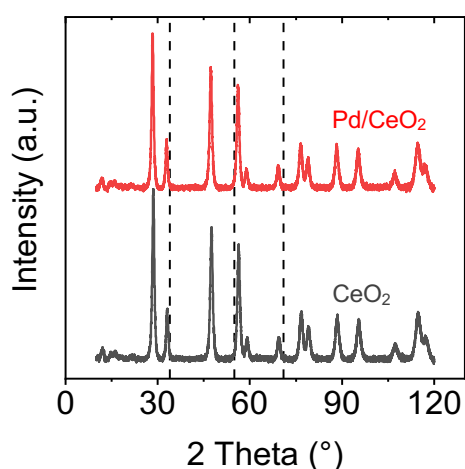

Fig. S1: Powder XRD of the Pd/CeO<sub>2</sub> catalyst (red) and the support material CeO<sub>2</sub> (black). Dashed lines indicate the position of potential reflexes caused by PdO-species.

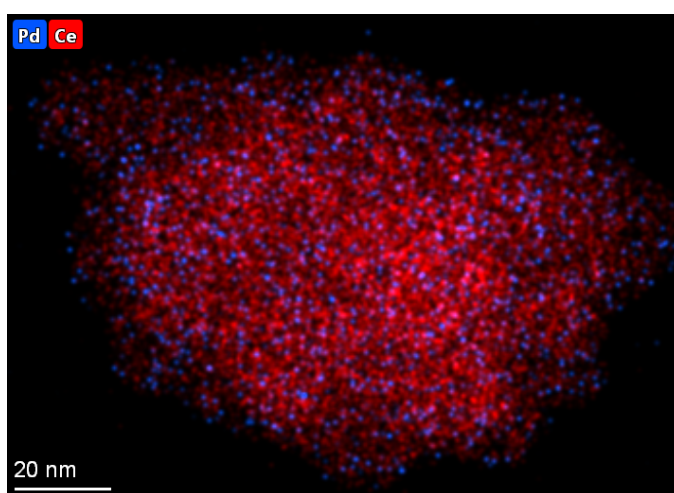

Fig S2: STEM EDXS image of the Pd/CeO<sub>2</sub> catalyst.

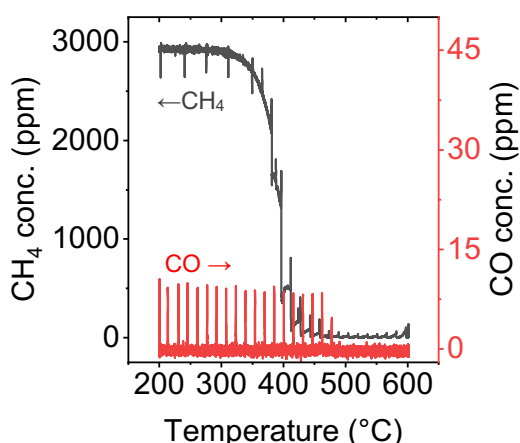

Fig. S3: CH<sub>4</sub> (black) and CO (red) concentration profile during a light-off measurement while SRPs are applied. Operation at a GHSV of 20 000 h<sup>-1</sup> in 3200 ppm CH<sub>4</sub>, 10 vol.-% O<sub>2</sub>, 10 vol.-% H<sub>2</sub>O and balance N<sub>2</sub>.

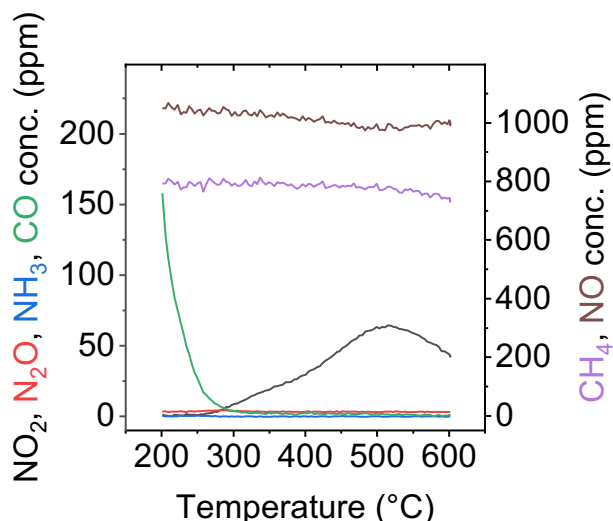

Fig. S4: Concentration of different species during the light-off measurement in simulated exhaust gas in static mode; operation at a GHSV of 60 000 h<sup>-1</sup> in the lean gas composition listed in Tab. 2 in the main manuscript.

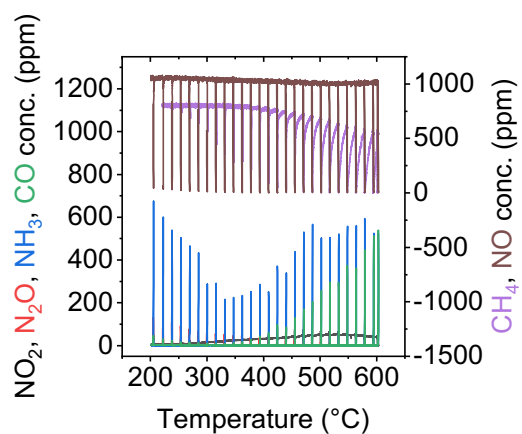

Fig. S5: Concentration of different species during the light-off measurement in simulated exhaust gas in dynamic operation (SRP mode); operation at a GHSV of 60 000 h<sup>-1</sup> in the gas compositions listed in Tab. 2 in the main manuscript.

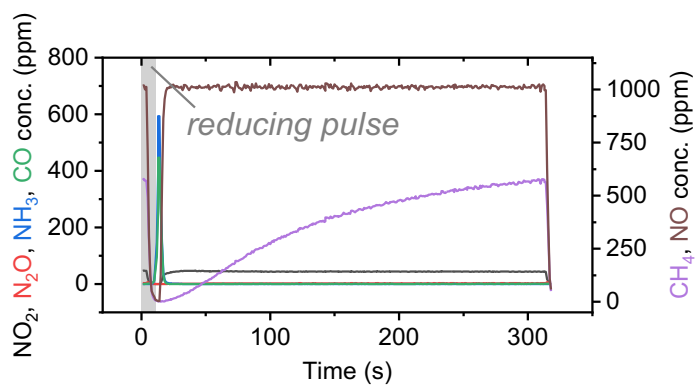

Fig. S6: Temporal evolution of the species concentration after applying a short reducing pulse (SRP) at time = 0 s for 10 s during a light-off test in a simulated exhaust gas composition in SRP mode (c.f. Fig. S5) between 577 °C and 592 °C.
